# Supplementary material
Source: PubMed Central journal article supplement (PMC6682046)
Supplement: ao9b00823_si_001.pdf [file ao9b00823_si_001.pdf]

## **Small Intestine Specific Delivery of Anti-diabetic Extracts from *Withania coagulans* using Polysaccharide-based Enteric-coated Nanoparticles**

Kaarunya SAMPATHKUMAR<sup>a</sup>, Siriporn RIYAJAN<sup>c</sup>, Chiew Kei TAN<sup>a</sup>, Philip DEMOKRITOU<sup>d</sup>, Nuannoi CHUDAPONGSE<sup>c</sup> and Say Chye Joachim LOO<sup>a,b,\*</sup>

<sup>a</sup>School of Material Science and Engineering, Nanyang Technological University, 50 Nanyang Avenue, 639798 Singapore.

<sup>b</sup>Singapore Centre for Environmental Life Sciences Engineering (SCELSE), Nanyang Technological University, 60 Nanyang Drive, 637551 Singapore.

<sup>c</sup>School of Preclinical Sciences, Institute of Science, Suranaree University of Technology, Nakhon Ratchasima, 30000, Thailand

<sup>d</sup>Center for Nanotechnology and Nanotoxicology, Department of Environmental Health, Harvard T. H. Chan School of Public Health, Boston, Massachusetts 02115, United States

\*corresponding author:

Associate Professor Joachim Loo

School of Materials Science and Engineering, Nanyang Technological University,  
50 Nanyang Avenue, Singapore 639798

Phone: +65 67904603

Fax: +65 67909081

Email: [joachimloo@ntu.edu.sg](mailto:joachimloo@ntu.edu.sg)

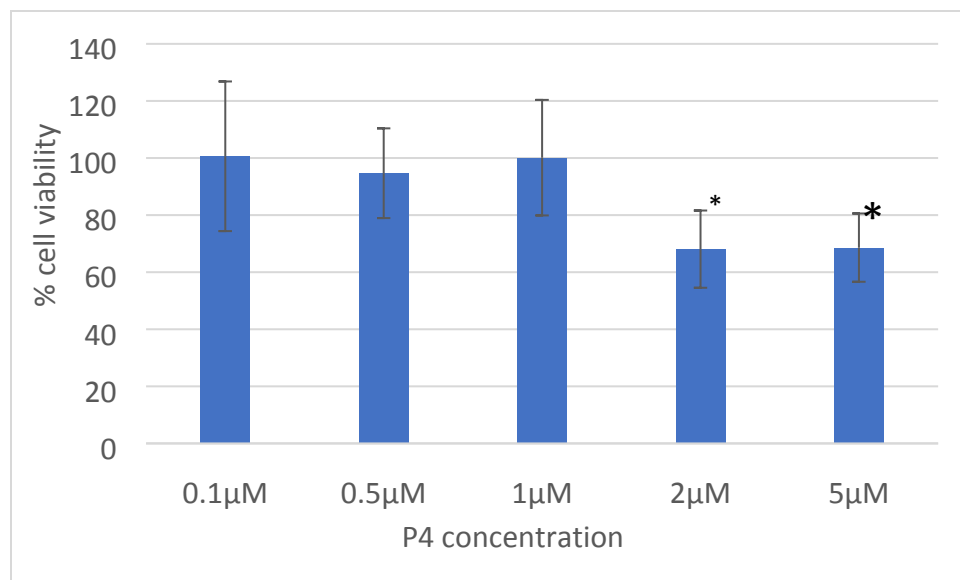

**Figure S1** Cytotoxicity effect of P4 on MIN6 cells. \* Significantly different from the rest of the concentrations,  $p < 0.05$  (one-way Anova post hoc Tukey test,  $n=3$ ). Data expressed as mean and standard deviation.

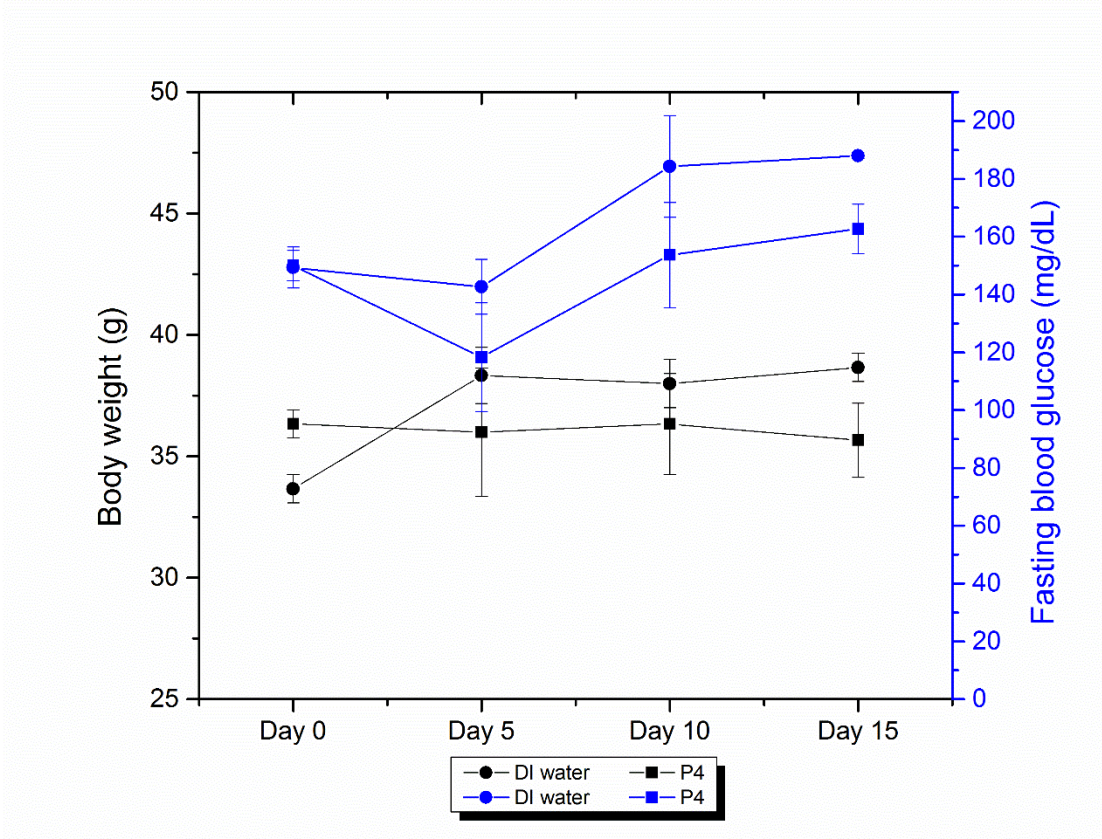

**Figure S2** Body weight and FBG values of normal control mice fed DI water or P4 for 15 days

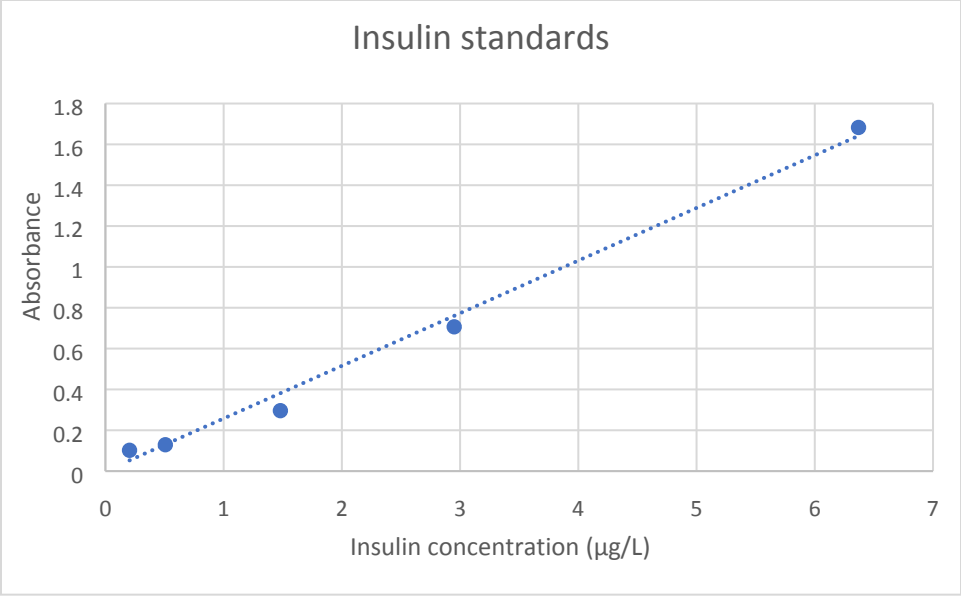

**Figure S3** Calibration standards for insulin using ELISA assay. The mercodia mouse insulin Elisa kit has a detection range of 0.2 - 6.5 µg/L and can accurately detect insulin concentrations less than or equal to 0.2 µg/L.

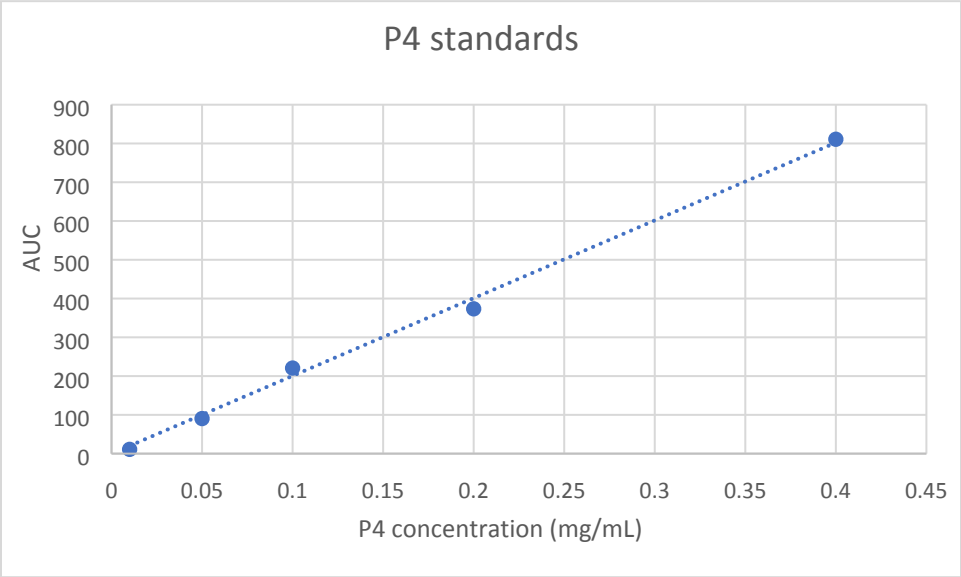

**Figure S4** Calibration standards for P4 using HPLC
